# Supplementary material for: Structural basis of arrestin-3 activation and signaling
Source: PubMed Central journal article supplement (PMC5681653; doi:10.1038/s41467-017-01218-8), 2017-11-10
Supplement: 41467_2017_1218_MOESM2_ESM.pdf [file 41467_2017_1218_MOESM2_ESM.pdf]

## **Description of Additional Supplementary Files**

File Name: Supplementary Movie 1

Description: A morph between basal arrestin and active arrestin highlights how different conformations are available to effectors. The N-domain is in blue, the C-domain is in grey, the receptor-binding ridge and finger loop is in green, arrestin switch regions are in orange, and the register-shifted  $\beta$ -strand is in magenta.

File Name: Supplementary Movie 2

Description: A morph between basal and active arrestin after a 180° rotation around the y-axis.
